# Supplementary material
Source: MDPI journal article supplement (https://www.mdpi.com/2071-1050/13/16/8687)
Supplement: s1 [file s1 › sustainability-1302164-supplementary.pdf]

Supplementary figure:

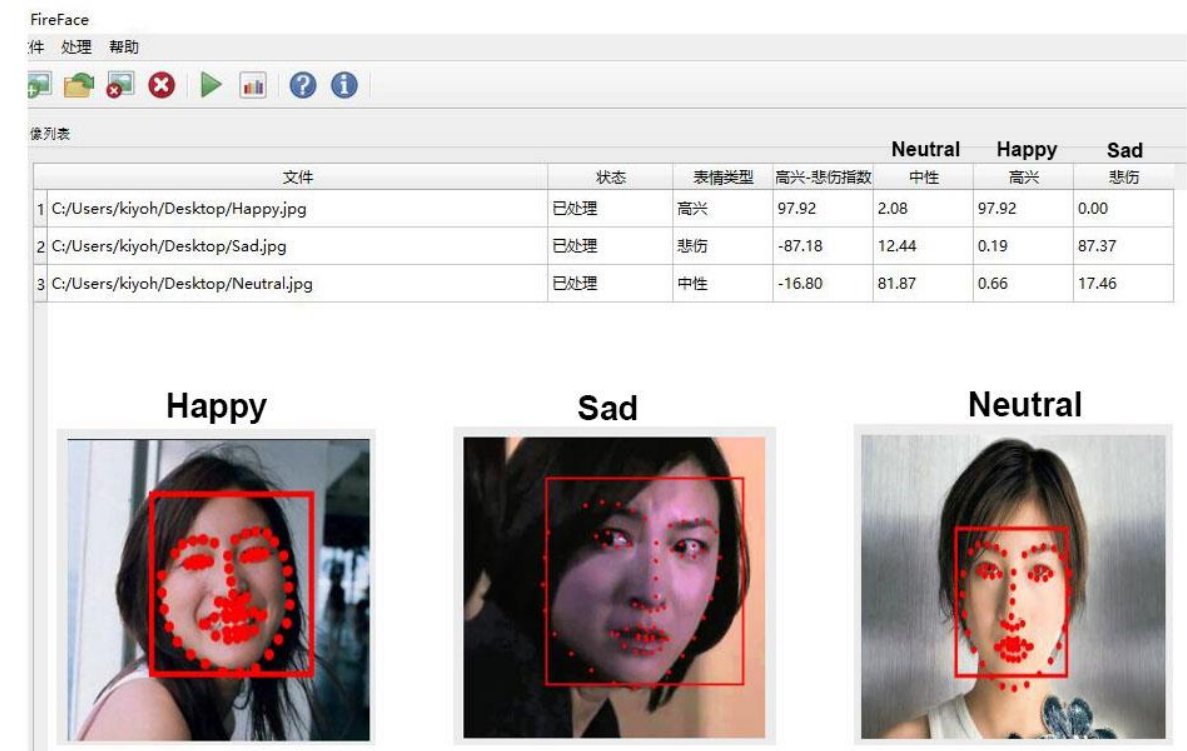

**Figure S1.** The panel of FireFACE software V1.0 to recognize photos with typically happy, sad, and neutral facial expressions. The model is an entertainment star whose name is Ryoko Hirose from Japan. Photos are downloaded from following websites:

Happy: <https://images.app.goo.gl/Kh5FgWEMMSPUa3sD9>

Sad: <https://images.app.goo.gl/GazwjvTh8a6qiyBa9>

Neutral: <https://images.app.goo.gl/Hn2gtLonVpoLd5o27>

This figure has also been used as an example for a published study[1]:

Wei, H.; Hauer, R.J.; Zhai, X., The relationship between the facial expression of people in university campus and host-city variables. *Appl. Sci.-Basel* **2020**, *10*, 1474. <https://doi.org/10.3390/app10041474>
